# Supplementary material
Source: Springer Nature journal article supplement (https://www.springermedizin.de/resource/supplementary/12990_2009_258_MOESM1_ESM.pdf/9612902)

## A. Ipsilateral

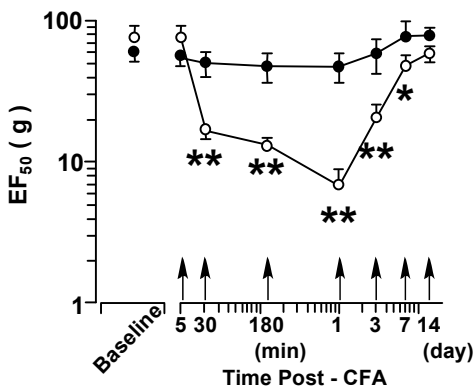

## B. Contralateral

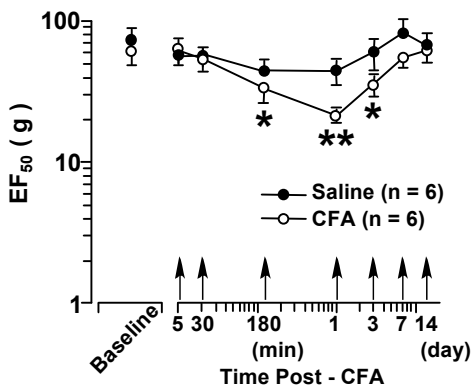

## C. Ipsilateral

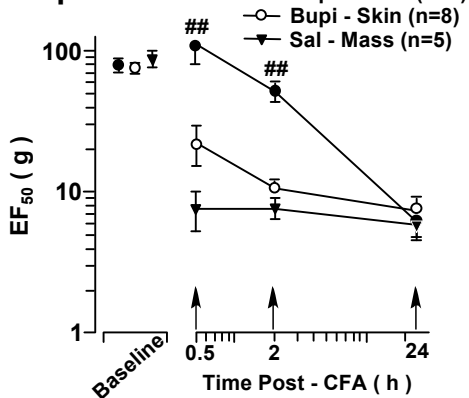

Supplement: MOESM1 [file 9612902]
